# Supplementary material
Source: PubMed Central journal article supplement (PMC4734577)
Supplement: supp_pp.15.01663_PP2015-01663R1_Supplemental_Figure_S1_S3.pdf [file supp_pp.15.01663_PP2015-01663R1_Supplemental_Figure_S1_S3.pdf]

# Supplementary Figure S1

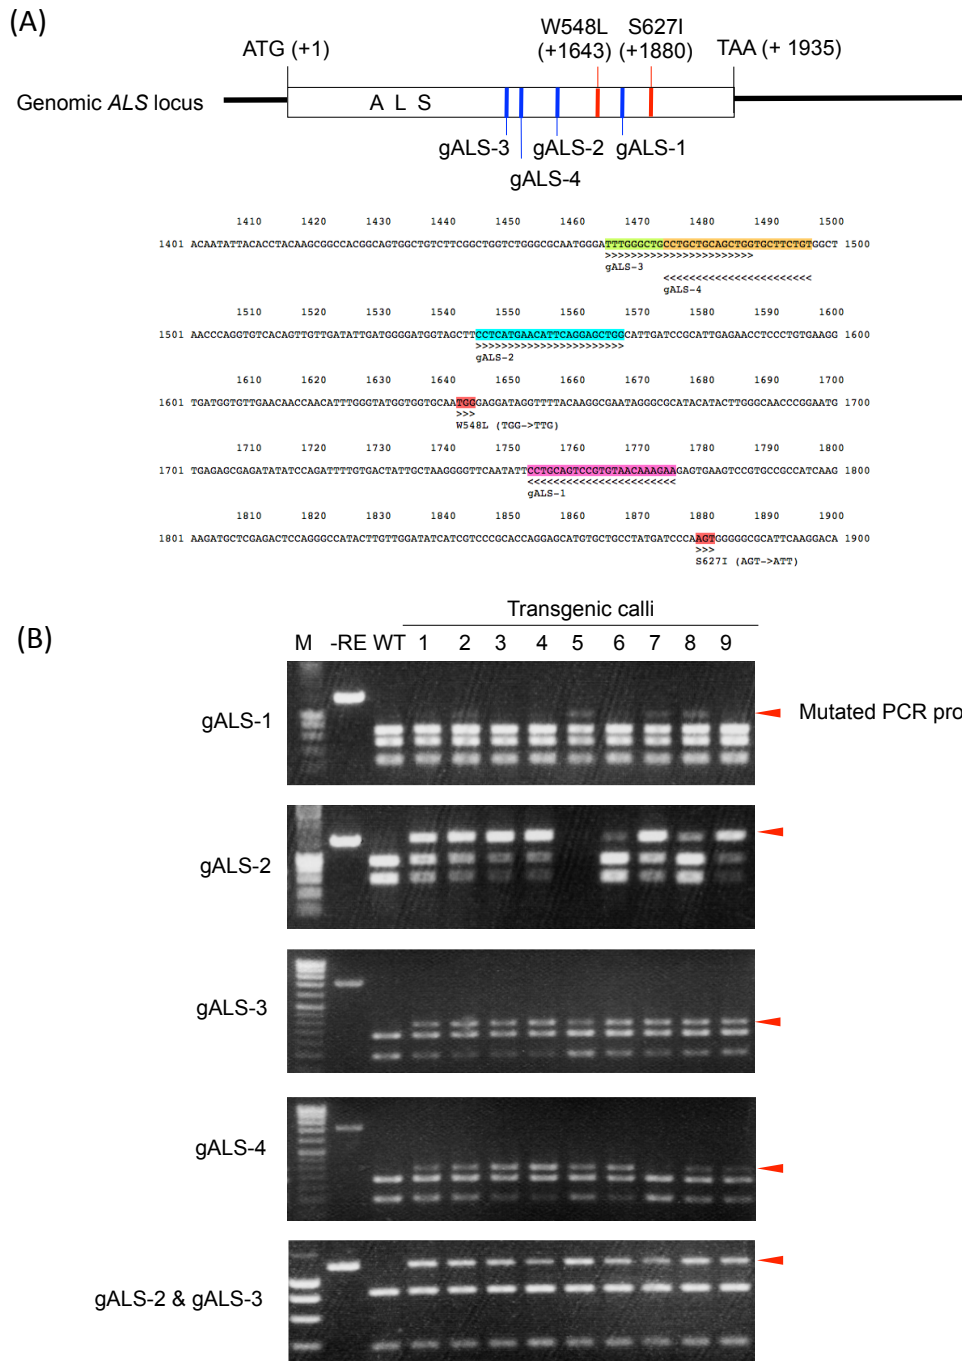

## CRISPR/Cas9 mediated target mutagenesis in OsALS gene

(A) Target site of CRISPR/Cas9-mediated target mutagenesis in OsALS gene. Blue vertical lines indicate the location of target site of gALS-1~4. Red vertical lines indicate the location of W548L and S627I mutations, which confer BS resistance. Detailed sequences of target sites (20bp + 3bp, NGG) are shown in the bottom panel. Sequential arrowheads below sequence indicate the direction of gRNA. (B) CAPS analysis of the each target site. DNA extracted from independent pZH\_gRNA (gALS-1~4)\_MMCas9 transformed calli was subjected to PCR and subsequent restriction enzyme digestion. Restriction enzymes used for detecting mutations in target sites of gALS-1, 2, 3, 4 are *Pst* I, *Bsp*HI, *Pvu* II and *Pst* I respectively. *Bsp*HI were used for the CAPS analysis of gALS-2 & gALS-3 transformed calli. PCR primers used for these CAPS analysis are shown in Mikami et al. (2015a).

## Supplementary Figure S2

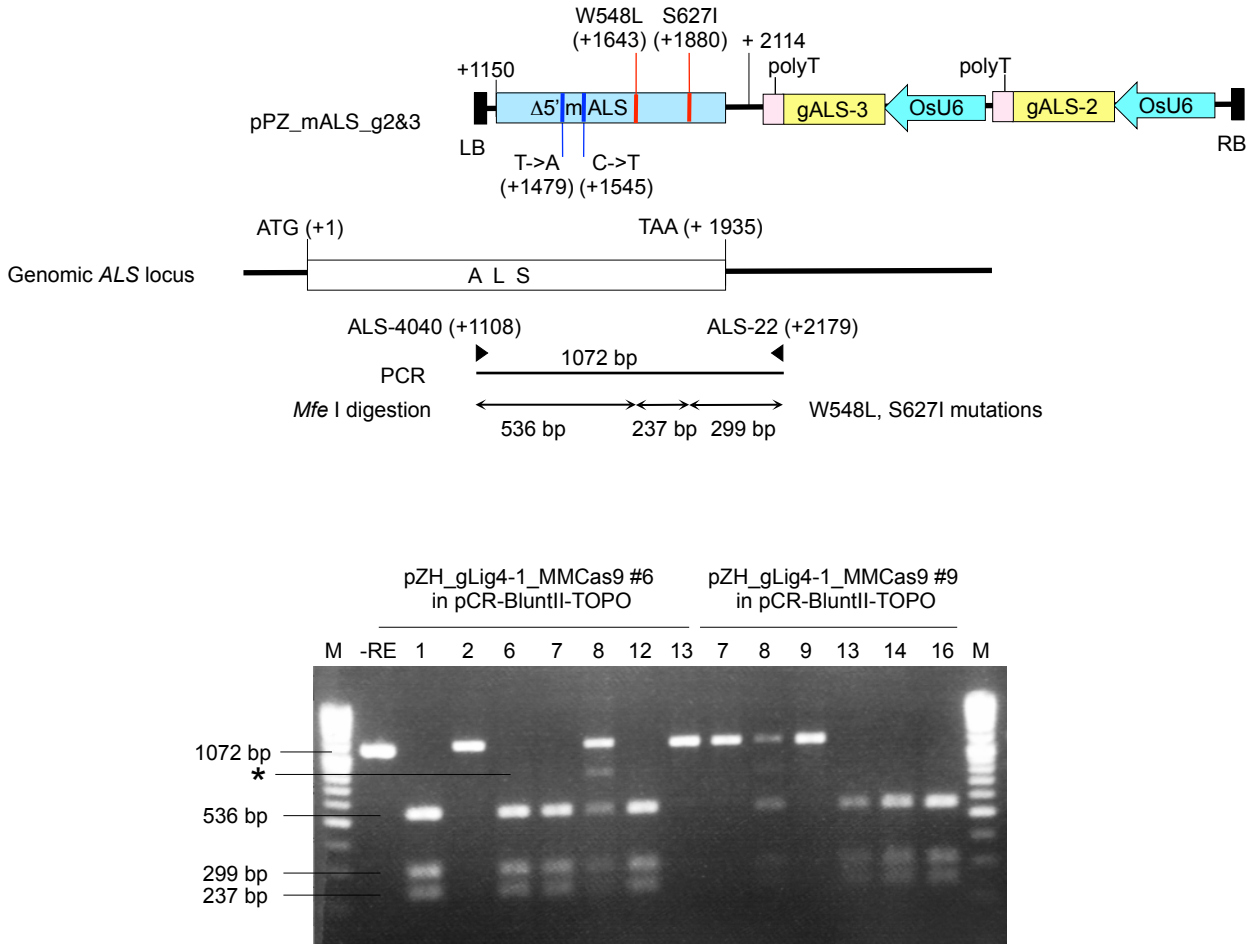

### Demonstration of the fact that artificial heteroduplex of WT and mutated *ALS* created by PCR is not digested by high fidelity version of *Mfe* I

PCR product (ALS-4040 ~ ALS-22) of pZH\_gLig4-2\_MMCas9 #6, #9 (Fig. 4B) were cloned into pCR-Blunt II-TOPO (Invitrogen) and used for the templates of same PCR reaction. PCR product of each clone were digested by *Mfe* I-HF (high fidelity version of *Mfe* I supplied by New England BioLabs). By this cloning, PCR product with/without W548L and S627I mutations are segregated. However, when mixture of wild-type *ALS* and *ALS* with W548L, S627I mutations were used as templates for this PCR (pZH\_gLig4-1\_MMCas9 #6 in pCR-Blunt II-TOPO #8, pZH\_gLig4-1\_MMCas9 #9 in pCR-Blunt II-TOPO #8), ca.700bp fragment (\*) was appeared by *Mfe* I digestion again. From these results, we consider that heteroduplex of mutated and non mutated amplicons generated by PCR reaction is partially tolerant to *Mfe* I-HF and imperfect digested products at W548L appeared as ca.700bp fragment.

# Supplementary Figure S3

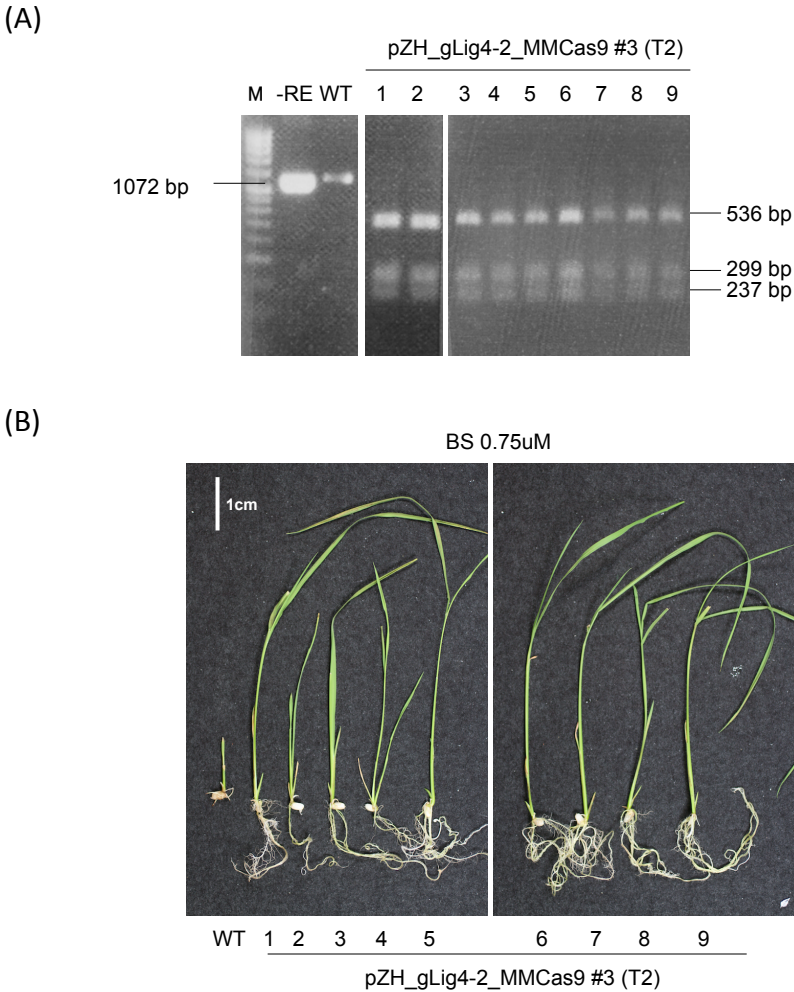

**T1 progenies of bi-allelic GT plant**  
(A) PCR-*Mfe* I digestion analysis of T2 progenies of pZH\_gLig4-2\_MM Cas9 #3, in which bi-allelic GT event was observed in T1 generation. (B) Seeds were germinated on MS medium for four days and transferred seedlings to MS medium containing 0.75uM of BS.
