# Supplementary material
Source: PubMed Central journal article supplement (PMC4734577)
Supplement: supp_pp.15.01663_PP2015-01663R1_Supplemental_Materials_and_Methods.pdf [file supp_pp.15.01663_PP2015-01663R1_Supplemental_Materials_and_Methods.pdf]

1 **Supplementary materials and methods**

2

3 **Cel I assay**

4 PCR products amplified using the following primers were subjected to Cel I nuclease  
5 reaction and analyzed by agarose gel electrophoresis. OsLig4-1F  
6 5'-TGACAAGCTTGAGGAAAATGAGAAGGCTGA-3', OsLig4-1R  
7 5'-ATGGCAACCTACTCCTCTCACAACACAACG-3'.

8

9 **Western blot analysis**

10 Proteins extracted from calli were fractionated by SDS-PAGE on a 5–20% Tris-glycine  
11 SDS gradient precast polyacrylamide gel (ATTO, Tokyo, JAPAN) and subjected to  
12 immunoblotting with Cas9 antibody (Active motif, Carlsbad, CA, USA) using  
13 immunoreaction enhancer solution Can Get Signal (TOYOBO, Osaka, Japan). After  
14 rinsing with 1xTBST, blots were hybridized with second-antibody, stabilized goat  
15 anti-mouse IgG HRP-conjugated (Thermo Fisher Scientific, Waltham, MA) and signals  
16 were detected using Super Signal West Dura Maximum Sensitivity Substrate (PIERCE,  
17 Rockford, IL, USA) and the ChemiDoc Touch Imaging system (Bio Rad, Hercules, CA,  
18 USA).

19
